# Supplementary material
Source: Springer Nature journal article supplement (https://www.springermedizin.de/resource/supplementary/12888_2010_766_MOESM1_ESM.pdf/9478670)
Supplement: MOESM1 [file 9478670]

**All Patients in Data Set**

Improvement of at least 2 points on two of five positive items at Week 2?

NO

YES

Improvement of at least 2 points on the excitement item at Week 2?

**Likely Responder**

NO

YES

**Likely Non-responder**

**Not Predictable**
